## ERRATUM

*J. Exp. Biol.* 53, p. 669

BERLIND, A., COOKE, I. M. and GOLDSTONE, MARTHA W.

‘Do the monoamines in crab pericardial organs play  
a role in peptide neurosecretion?’

Plate 1 facing p. 677.

The photomicrograph on the right should be labelled A and that on the left should be labelled B.
